# Supplementary material
Source: publisher figshare collection journal article supplement (https://acs.figshare.com/ndownloader/files/5817225)
Supplement: Supplementary file 1 [file 5817225]

THE JOURNAL OF  
PHYSICAL CHEMISTRY

J. Phys. Chem., 1996, 100(14), 5766-5780, DOI:[10.1021/jp952402c](https://doi.org/10.1021/jp952402c)

**Terms & Conditions**

Electronic Supporting Information files are available without a subscription to ACS Web Editions. The American Chemical Society holds a copyright ownership interest in any copyrightable Supporting Information. Files available from the ACS website may be downloaded for personal use only. Users are not otherwise permitted to reproduce, republish, redistribute, or sell any Supporting Information from the ACS website, either in whole or in part, in either machine-readable form or any other form without permission from the American Chemical Society. For permission to reproduce, republish and redistribute this material, requesters must process their own requests via the RightsLink permission system. Information about how to use the RightsLink permission system can be found at <http://pubs.acs.org/page/copyright/permissions.html>

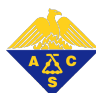

**ACS Publications**

MOST TRUSTED. MOST CITED. MOST READ.

Copyright © 1996 American Chemical Society

31752402C

H-5780-1

**Quenching Rate Constants and Product Assignments for Reactions of Xe(7p[3/2]<sub>2</sub>, 7p[5/2]<sub>2</sub> and 6p'[3/2]<sub>2</sub>) Atoms with Rare Gases, CO, H<sub>2</sub>, N<sub>2</sub>O, CH<sub>4</sub> and Halogen-Containing Molecules**

by

V. Alekseev<sup>†</sup> and D.W. Setser

Department of Chemistry

Kansas State University

Manhattan, Kansas 66506

**REVISED**

JAN 16 1996

**SUPPLEMENTARY MATERIAL**JOURNAL OF PHYSICAL  
CHEMISTRY

For constant laser power and bandwidth, the two-photon cross-section is proportional to the square of the two-photon matrix element,  $M_{f,g}$ .

$$M_{f,g} = \frac{2\pi}{h} \sum_k \frac{\mu_{kf} \mu_{gk}}{(\omega_{gk} - \omega_L)} \quad (5a)$$

If the integrals are assumed to be positive, the individual dipole matrix elements in Eq. (5a) can be expressed in terms of the oscillator strengths of the corresponding spectral lines. For linear polarization of the laser beam, only transitions to Xe\* substates with  $m_J=0$  are allowed and Eq. 5b can be used.

$$M_{f,g} = \frac{2\pi}{h} \sum_k \frac{G_{g,k,f}}{(\omega_{gk} - \omega_L)} \left[ \frac{f_{kf} f_{gk}}{(\omega_{gk} \times \omega_{kf})} \right]^{1/2} \langle J_f 100 | 10 \rangle \langle 1100 | 00 \rangle \quad (5b)$$

$G_{g,k,f}$  is a factor depending upon the degeneracy of atomic states and the last two terms in brackets are the Clebsh-Gordon coefficients. If the intermediate state, k, lies below the final state,  $G_{g,k,f} = g_g/g_f$ , if state k is above the final state,  $G_{g,k,f} = g_g^2/g_k g_f$ . The results of the calculations are presented in Table 7. The 6s[3/2]<sub>1</sub> intermediate state is the most important for the Xe(6p) cross section; but, several intermediate states could contribute to the Xe(6p',7p) cross sections. The calculated relative two-photon cross-sections for all Xe(6p,7p,6p') states are of the same order of magnitude, assuming that all the individual matrix elements are positive. In general, the oscillator strengths for s->p transitions are more accurate than for d->p transitions; the reliability could be particularly poor for nd(J=1) → np(J=0) transitions, since these levels are very sensitive to configuration mixing<sup>20a</sup>. The uncertainty of the matrix element for the 7p[1/2]<sub>0</sub> state could be especially large due to contributions from routes involving the nd(J=1) states to the total value of  $M_{f,g}$  and to the contribution from several intermediate states. Indeed, this state reveals the largest disagreement with the experimental value. Since the calculated two-photon matrix elements generally agree with the experimental data for the 6p and 6p' states, the contributions of individual intermediate states to the sum apparently do not cancel.

Table 7. Two-photon matrix elements<sup>a</sup>,  $M_{r,g}$ , for transitions to 6p, 6p' and 7p states of Xe

| Final State                       | 6p[1/2] <sub>0</sub> | 6p[3/2] <sub>2</sub> | 6p[5/2] <sub>2</sub> | 6p'[1/2] <sub>0</sub> | 6p'[3/2] <sub>2</sub> | 7p[1/2] <sub>0</sub> | 7p[3/2] <sub>2</sub> | 7p[5/2] <sub>2</sub> |
|-----------------------------------|----------------------|----------------------|----------------------|-----------------------|-----------------------|----------------------|----------------------|----------------------|
| <b>Intermediate State</b>         |                      |                      |                      |                       |                       |                      |                      |                      |
| 6s[3/2] <sub>1</sub>              | 100 <sup>a</sup>     | 74                   | 109                  | 14                    | 12                    | 20                   | 11                   | 10                   |
| 7s[3/2] <sub>1</sub>              | 21                   | 36                   | 45                   | 32                    | 0                     | 73                   | 72                   | 94                   |
| 6s'[1/2] <sub>1</sub>             | 26                   | 31                   | 1                    | 49                    | 83                    | 26                   | 17                   | 19                   |
| 7s'[1/2] <sub>1</sub>             | 0                    | 0                    | 0                    | 13                    | 38                    | 6                    | 9                    | 8                    |
| 5d[1/2] <sub>1</sub>              | 3                    | 7                    | 4                    | 9                     | 13                    | 6                    | 3                    | 4                    |
| 6d[1/2] <sub>1</sub>              | 1                    | 2                    | 1                    | 1                     | 2                     | 3                    | 5                    | 4                    |
| 7d[1/2] <sub>1</sub>              | 2                    | 3                    | 1                    | 6                     | 2                     | 1                    | 10                   | 7                    |
| 5d[3/2] <sub>1</sub>              | 75                   | 5                    | 27                   | 30                    | 12                    | 34                   | 3                    | 10                   |
| 6d[3/2] <sub>1</sub>              | 18                   | 0                    | 4                    | 28                    | 4                     | 66                   | 3                    | 27                   |
| 7d[3/2] <sub>1</sub>              | 1                    | 0                    | 0                    | 1                     | 1                     | 1                    | 1                    | 1                    |
| 5d'[3/2] <sub>1</sub>             | 3                    | 1                    | 1                    | 3                     | 12                    | 21                   | 3                    | 4                    |
| 6d'[3/2] <sub>1</sub>             | 1                    | 0                    | 0                    | 11                    | 4                     | 5                    | 1                    | 0                    |
| 7d'[3/2] <sub>1</sub>             | 0                    | 0                    | 0                    | 4                     | 1                     | 3                    | 0                    | 1                    |
| $ \Sigma M_{r,g} ^2$ <sup>b</sup> | 2.4                  | 1.0                  | 1.5                  | 1.6                   | 1.3                   | 2.7                  | 0.7                  | 1.4                  |
| experimental                      | 2-3                  | 1.0                  | 1.6-2.0              | 1.2                   | 1.0                   | 0.25                 | 0.7                  | 0.3                  |
| cross sections <sup>c,d</sup>     |                      |                      |                      | 1.6                   | 1.3                   | 0.3                  | 0.9                  | 0.4                  |

- a. For convenience of presentation, the individual matrix elements are given as relative values with the transition to the 6p[1/2]<sub>0</sub> via 6s[3/2]<sub>1</sub> set equal to 100. The oscillator strengths from the ground state were taken from references 20d; the oscillator strengths for the transitions from the ns and nd resonance states to the final np states were taken from ref. 21 or 20c.
- b. The total relative excitation cross section, which is the square of the sum over the  $M_{r,g}$  values, is presented relative to 6p[3/2]<sub>2</sub> state as 1.0.
- c. See text for the description of the experimental values for Xe(6p) states.
- d. See text for the experimental Xe(6p',7p) values. The experimental comparison of 6p[3/2]<sub>2</sub> and 6p'[3/2]<sub>2</sub> cross sections gave a ratio of unity; however, the uncertainty is large and the second line shows the experimental results if the 6p'[1/2]<sub>0</sub> relative cross section is scaled to the calculated value.
